# Supplementary material
Source: PubMed Central journal article supplement (PMC1413930)
Supplement: pnas_0511299103_3.pdf [file pnas_0511299103_3.pdf]

A

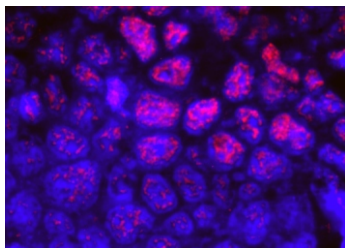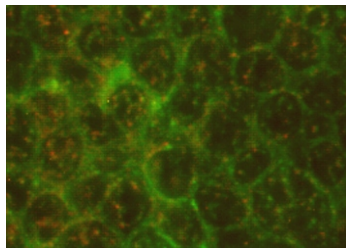

B

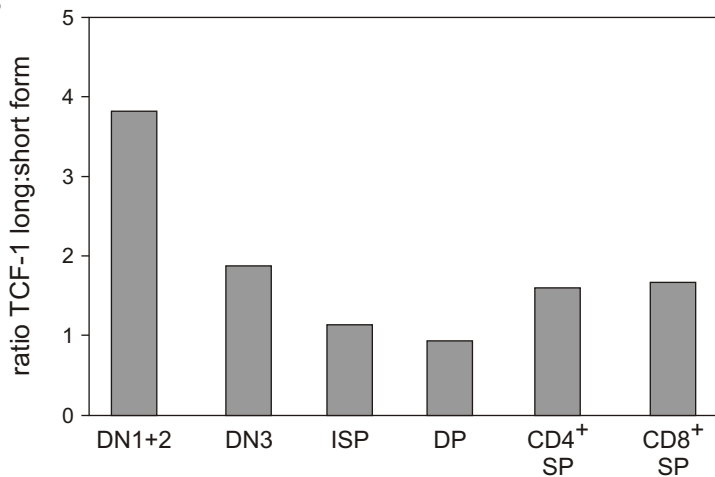

C

|                    |                  | DN1+2 | DN3 | ISP | DP | CD4 <sup>+</sup> SP | CD8 <sup>+</sup> SP |
|--------------------|------------------|-------|-----|-----|----|---------------------|---------------------|
| activating factors | total -catenin   | ++    | ++  | +   | -  | -                   | --                  |
|                    | act -catenin     | +     | +   | +   | -  | -                   | -                   |
|                    | plakoglobin      | ++    | +   | +/- | -  | +/-                 | +/-                 |
|                    | TCF-1 long/short | ++    | +/- | -   | -  | +/-                 | +/-                 |
| inhibiting factors | axin             | +/-   | +/- | +/- | +  | +                   | +                   |
|                    | HMG2L1           | +/-   | +/- | +   | +  | +/-                 | +/-                 |

promotes Wnt signalling

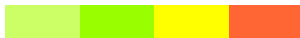

hampers Wnt signalling
