# Supplementary material
Source: PubMed Central journal article supplement (PMC1413930)
Supplement: pnas_0511299103_5.pdf [file pnas_0511299103_5.pdf]

**Table 1. Expression levels of intracellular Wnt signaling molecules**

|        | DN1+2 | DN3   | ISP   | DP    | CD4 <sup>+</sup> SP | CD8 <sup>+</sup> SP |
|--------|-------|-------|-------|-------|---------------------|---------------------|
| JUP    | 327.2 | 184.3 | 112.8 | 88.5  | 108.4               | 156.7               |
| APC    | 84.0  | 65.0  | 57.7  | 70.5  | 65.8                | 57.3                |
| Axin1  | 182.9 | 165.2 | 173.9 | 205.2 | 217.4               | 227.5               |
| TLE3   | 192.3 | 213.7 | 206.9 | 200.6 | 177.0               | 208.5               |
| Pygo1  | 39.2  | 40.7  | 35.3  | 39.9  | 32.7                | 33.2                |
| Bcl9   | 93.8  | 103.6 | 80.4  | 94.0  | 118.5               | 130.7               |
| HMG2L1 | 144.5 | 146.8 | 185.1 | 202.6 | 161.7               | 147.1               |

Relative mRNA expression levels of different Wnt signaling components in human thymocyte subsets determined by microarray analysis. TLE3 is the only Groucho homologue that was found to be expressed at significant levels in thymocytes. JUP, junction plakoglobin
