# Supplementary material
Source: PubMed Central journal article supplement (PMC1413930)

E14

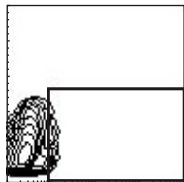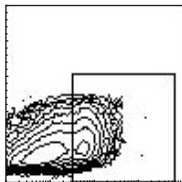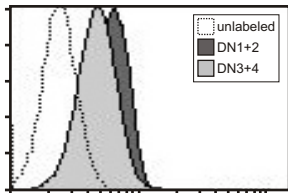

E15

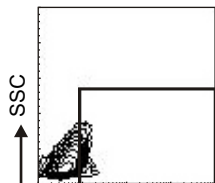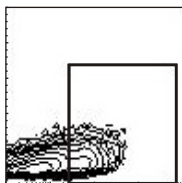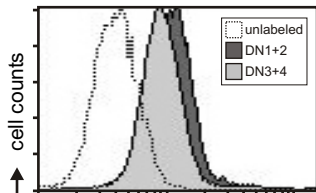

E16

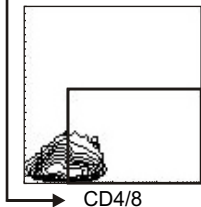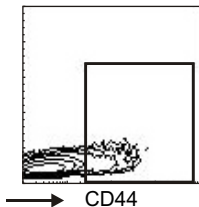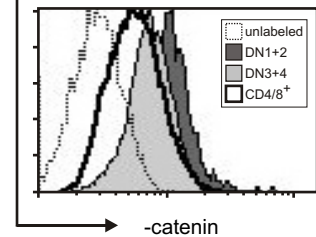

Supplement: pnas_0511299103_1.pdf [file pnas_0511299103_1.pdf]

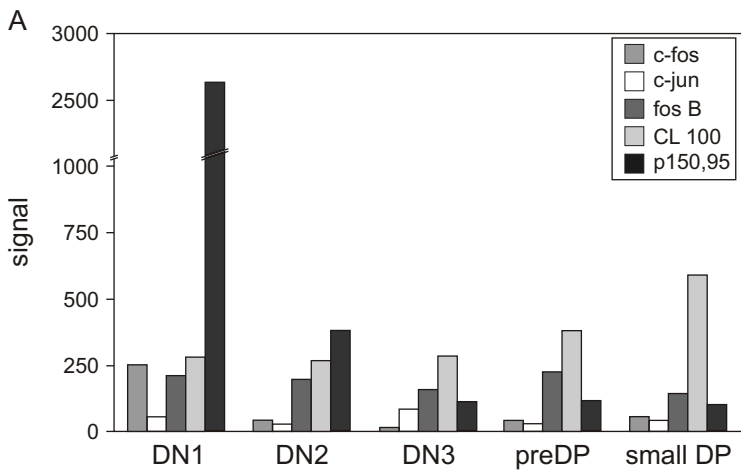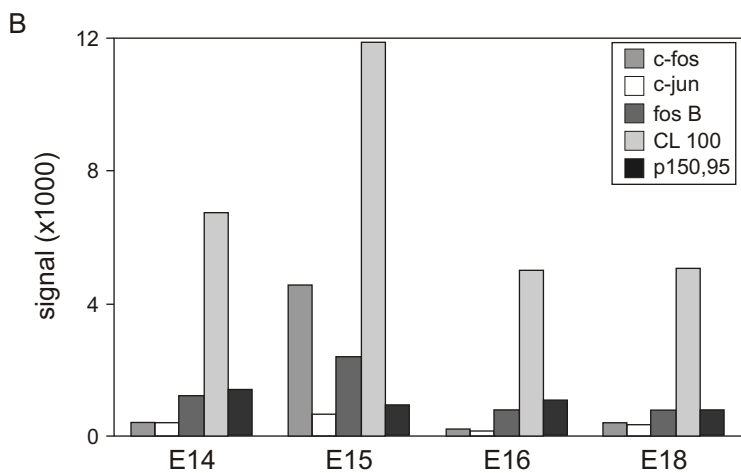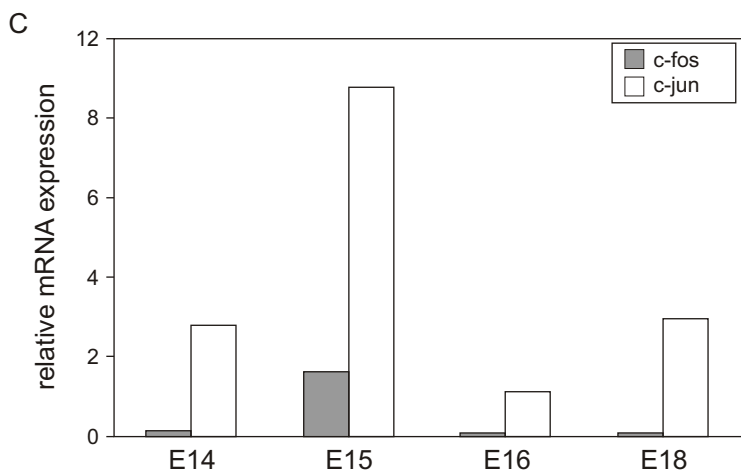

Supplement: pnas_0511299103_2.pdf [file pnas_0511299103_2.pdf]

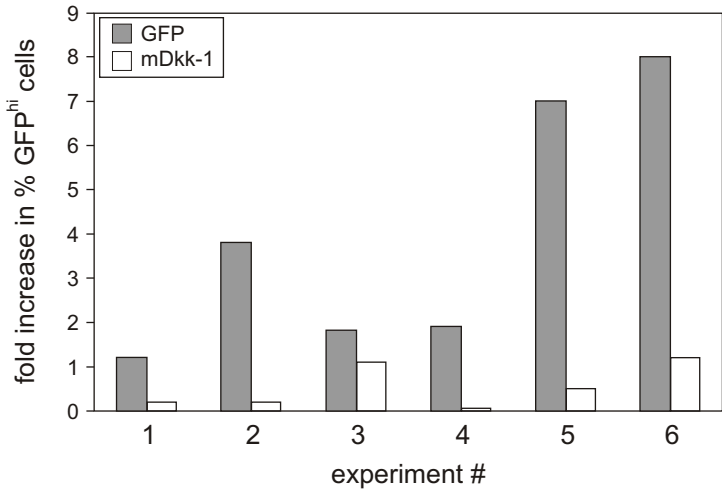

Supplement: pnas_0511299103_4.pdf [file pnas_0511299103_4.pdf]
